# Supplementary material for: Assessing Options for Remediation of Contaminated Mine Site Drainage Entering the River Teign, Southwest England
Source: Preprints.org preprint supplement (doi:10.20944/preprints202007.0236.v1), 2020-07-11
Supplement: Supplementary file 1 [file supplementary]

# Assessing options for remediation of contaminated mine site drainage entering the River Teign, Southwest England

Abigail Jordan<sup>1</sup>, Rachel Hill<sup>1</sup>, Adrienne Turner<sup>1</sup>, Tyrone Roberts<sup>1</sup>, Sean Comber<sup>1\*</sup>

\* Corresponding author: sean.comber@plymouth.ac.uk

<sup>1</sup> School of Geography, Earth and Environmental Sciences, University of Plymouth, Drakes Circus, Plymouth, PL4 8AA.

## S1 Steps outlining the kinetics experiment to determine analyte adsorption rates

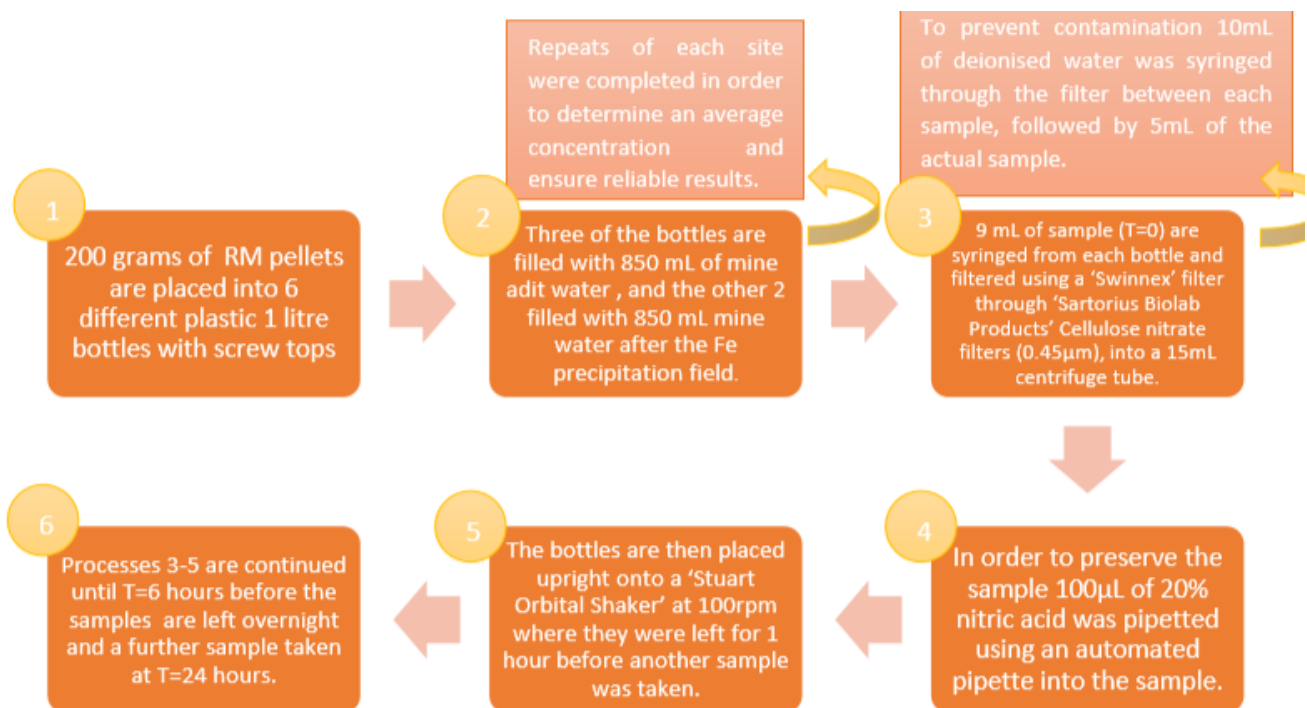

## S2 Steps outlining column experiment.

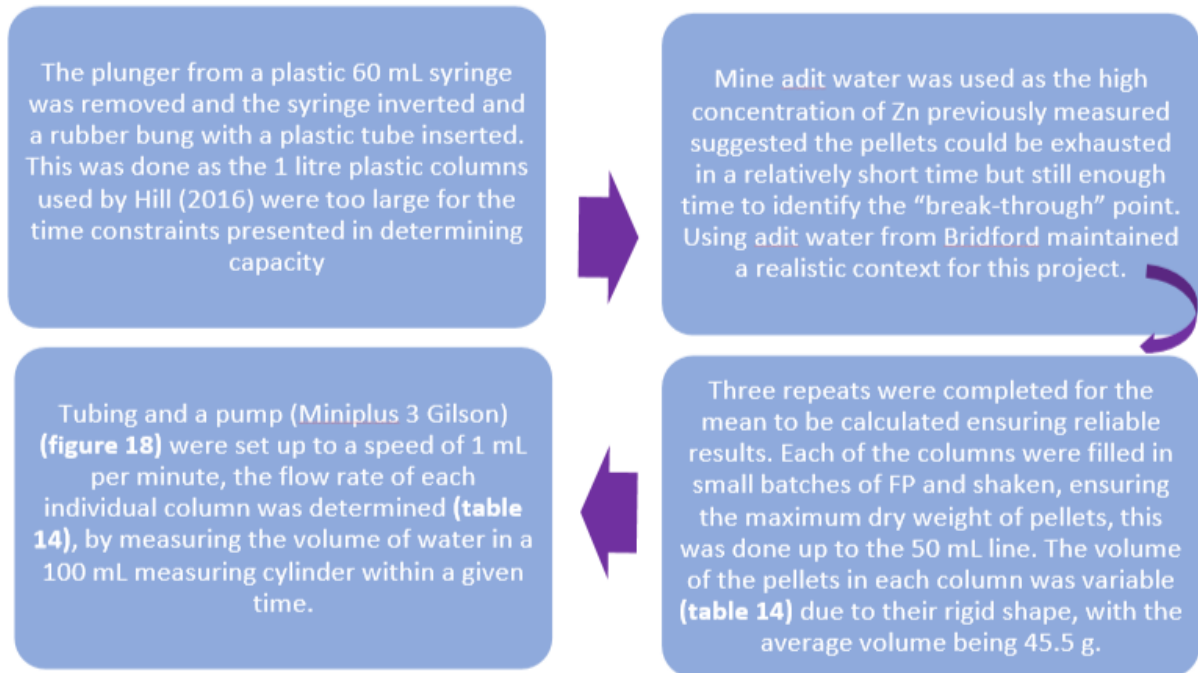

### S3 Environment Agency sampling points for the River Teign

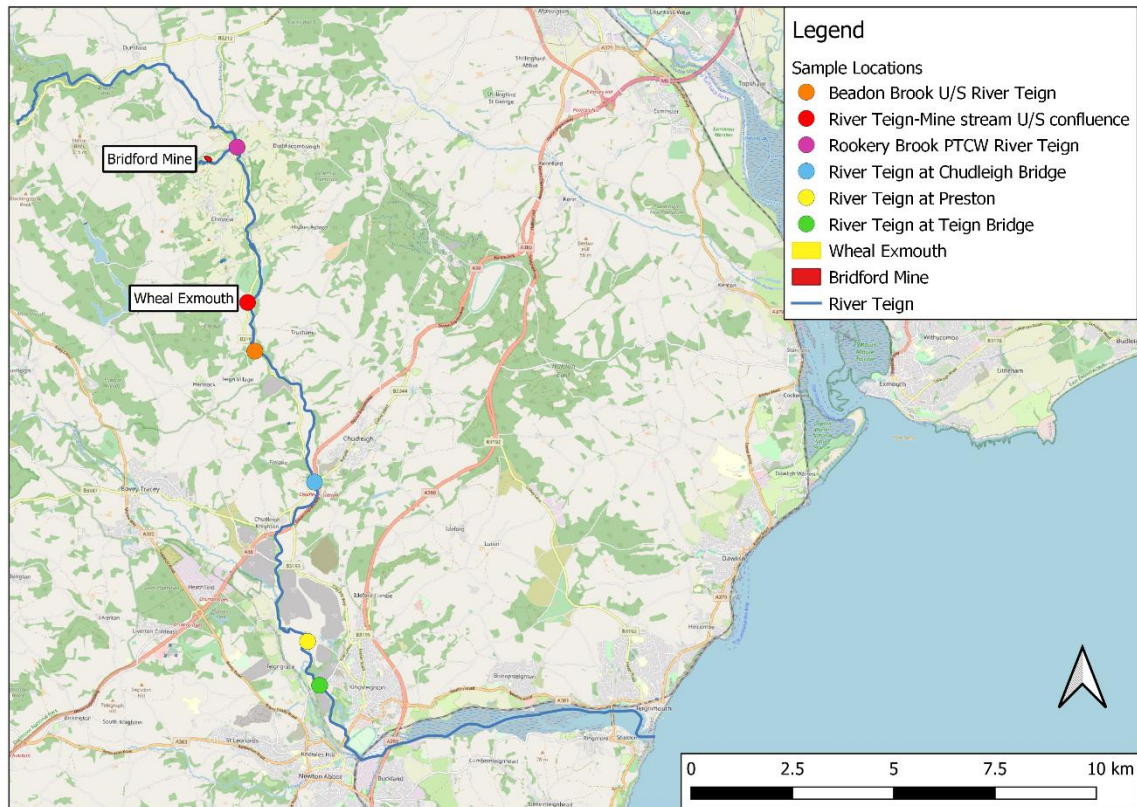

### S4: Zinc concentration after 24 hours with the different pellets from Turner (2017) and Hill (2016)

| 24 hours                               | Turner (2017)                  |             |             | Hill (2016) |             |
|----------------------------------------|--------------------------------|-------------|-------------|-------------|-------------|
|                                        | New                            | Fired       | FAE         | Fired       | Compressed  |
| <b>Hours passed</b>                    | <b>Zinc concentration µg/l</b> |             |             |             |             |
| 0                                      | 11600                          | 10400       | 11300       | 9643        | 9643        |
| 1                                      | 9800                           | 8720        | 9880        | 1582        | 1636        |
| 2                                      | 8900                           | 8120        | 8410        | 1388        | 575         |
| 3                                      | 5600                           | 7180        | 7470        |             | 366         |
| 4                                      | 4460                           | 2640        | 6150        |             | 243         |
| 5                                      | 3400                           |             | 5400        |             | 175         |
| 6                                      | 2250                           |             | 4880        |             | 153         |
| 24                                     | 616                            | 909         | 311         | 68.9        | 43.8        |
| <b>removal efficiency after 24 hrs</b> | <b>94.7</b>                    | <b>91.3</b> | <b>97.2</b> | <b>99.3</b> | <b>99.5</b> |

**S5 Removal efficiencies for Zn, Cd and Pb at 2, 24 and 53 hours (Turner 2017; Hill 2016).**

| Duration | Zinc removal % |       |      |      |
|----------|----------------|-------|------|------|
|          | Compressed     | Fired | FAE  | New  |
| 2 hours  | 73.7           | 22    | 25.6 | 23.3 |
| 24 hours | 99.5           | 99.3  | 97.2 | 94.7 |
| 53 hours | 99.8           | 99.9  | -    | -    |

| Duration | Cadmium removal % |       |      |      |
|----------|-------------------|-------|------|------|
|          | Compressed        | Fired | FAE  | New  |
| 2 hours  | 94.4              | 25.3  | 28.2 | 27.6 |
| 24 hours |                   |       |      |      |
| 53 hours | 99.5              | 99.9  |      |      |

  

| Duration | Lead removal % |       |     |      |
|----------|----------------|-------|-----|------|
|          | Compressed     | Fired | FAE | New  |
| 2 hours  | 99.2           | 92.7  | 64  | 96.3 |
| 24 hours |                |       |     |      |
| 53 hours | 99.9           | 99.8  |     |      |

**S6 Field scale trial at Bridford mine. Percentage removal of Zn, Cd and Pb over a 3-month period (Comber 2015)**

| Day | % removal Zn |            | % removal Cd |            | % removal Pb |            |
|-----|--------------|------------|--------------|------------|--------------|------------|
|     | filtered     | unfiltered | filtered     | unfiltered | filtered     | unfiltered |
| 3   | 91           | 84         | 94           | 94         | 99           | 99         |
| 9   | 81           | 80         | 91           | 91         | 99           | 99         |
| 20  | 77           | 78         | 87           | 86         | 99           | 98         |
| 26  | 63           | 62         | 75           | 74         | 97           | 95         |
| 33  | 45           | 39         | 56           | 48         | 85           | 51         |
| 38  | 36           | 31         | 45           | 43         | 74           | 68         |
| 44  | 28           | 28         | 44           | 42         | 66           | 58         |
| 51  | 24           | 24         | 39           | 36         | 68           | 53         |
| 58  | 27           | 22         | 41           | 37         | 66           | 60         |
| 67  | 31           | 24         | 40           | 35         | 46           | 36         |
| 72  | 37           | 34         | 51           | 42         | 43           | 39         |
| 79  | 28           | 31         | 45           | 48         | 73           | 51         |
| 89  | 26           | 23         | 38           | 39         | 73           | 43         |
| 104 | 36           | 19         | 57           | 36         | 79           | 58         |

**S7 Biochar removal efficiency results for Zn, Cd and Pb at 550°C and 700°C (Roberts 2018)**

| Removal efficiency (%) 2 hrs |       |         |      |       |         |      |
|------------------------------|-------|---------|------|-------|---------|------|
| Biochar                      | 550°C |         |      | 700°C |         |      |
|                              | zinc  | cadmium | lead | zinc  | cadmium | lead |
| Forestry waste               | 5     | -1      | 18   | 8     | 0       | 62   |
| Municipal waste              | 9     | 0.023   | 60   | 17    | 19      | 76   |
| Rice husk                    | 28    | 43      | 100  | 9     | 20      | 98   |
| Miscanthus straw pellet      | 21    | 35      | 97   | 50    | 62      | 100  |
| Wheat straw pellet           | 80    | 86      | 94   |       |         |      |
| Oil seed rape                | 80    | 88      | 91   | 81    | 90      | 100  |

**S8 Environment Agency monitoring data from 2000-2020 available at**

<https://environment.data.gov.uk/water-quality/view/landing>

All units µg/l

| Beadon brook |        |              |        |        |         |        |         |        |
|--------------|--------|--------------|--------|--------|---------|--------|---------|--------|
|              | Zn EQS | Dissolved Zn | bio zn | Cd EQS | mean Cd | Pb EQS | mean Pb | bio Pb |
| 2012         | 13.8   | 145          |        | 0.08   | 1.99    | 7.2    | 2.15    |        |
| 2013         | 13.8   | 203          |        | 0.08   | 2.47    | 7.2    | 2.28    |        |
| 2014         | 13.8   | 61           |        | 0.08   | 0.98    | 7.2    | 2       |        |
| 2015         | 13.8   | 176          | 120    | 0.08   | 2.02    | 7.2    | 1.15    | 0.72   |
| 2016         | 13.8   | 358          | 325    | 0.08   | 3.69    | 7.2    | 2.80    | 2.28   |
| 2017         | 13.8   | 249          | 211    | 0.08   | 2.76    | 7.2    | 1.95    | 1.34   |
| 2018         | 13.8   | 200          | 168    | 0.08   | 1.92    | 7.2    | 1.42    | 0.84   |
| 2019         | 13.8   | 138          | 107    | 0.08   | 1.64    | 7.2    | 1.72    | 0.74   |

| RT at Preston | Zn EQS | Dissolved Zn | bio zn | Cd EQS | mean Cd | Pb EQS | mean Pb |
|---------------|--------|--------------|--------|--------|---------|--------|---------|
| 2000          | 13.8   | 21.5         |        | 0.08   | 0.11    | 7.2    | 1.06    |
| 2001          | 13.8   | 30.9         |        | 0.08   | 0.08    | 7.2    | 1.25    |
| 2002          | 13.8   | 19.4         |        | 0.08   | 0.01    | 7.2    | 1.0     |
| 2003          | 13.8   | 20.3         |        | 0.08   | 0.09    | 7.2    | 2.09    |
| 2004          | 13.8   | 19.0         |        | 0.08   | 0.09    | 7.2    | 2.57    |
| 2005          | 13.8   | 21.1         |        | 0.08   | 0.09    | 7.2    | 2       |
| 2006          | 13.8   | 16.4         |        | 0.08   | 0.08    | 7.2    | 2.02    |
| 2007          | 13.8   | 16.1         |        | 0.08   | 0.10    | 7.2    | 2       |
| 2008          | 13.8   | 15.9         |        | 0.08   | 0.10    | 7.2    | 2       |

|      |      |      |       |      |        |     |       |
|------|------|------|-------|------|--------|-----|-------|
| 2009 | 13.8 | 15.8 |       | 0.08 | 0.105  | 7.2 | 2     |
| 2010 | 13.8 | 18.5 |       | 0.08 | 0.107  | 7.2 | 2     |
| 2011 | 13.8 | 15.0 |       | 0.08 | 0.100  | 7.2 | 2     |
| 2012 | 13.8 | 16.8 |       | 0.08 | 0.103  | 7.2 | 2     |
| 2013 | 13.8 | 15.9 |       | 0.08 | 0.107  | 7.2 | 2     |
| 2014 | 13.8 | 17.2 |       | 0.08 | 0.101  | 7.2 | 2     |
| 2015 | 13.8 | 13.8 | 9.19  | 0.08 | 0.0763 | 7.2 | 2     |
| 2016 | 13.8 | 16.9 | 8.90  | 0.08 | 0.0763 | 7.2 | 0.535 |
| 2017 | 13.8 | 16.7 | 10.90 | 0.08 | 0.0684 | 7.2 | 1.05  |
| 2018 | 13.8 | 18.4 | 9.74  | 0.08 | 0.0847 | 7.2 | 1.12  |
| 2019 | 13.8 | 16.3 | 10.13 | 0.08 | 0.0823 | 7.2 | 1.12  |

| RT at Chudeigh bridge | Zn EQS | Dissolved zn | bio zn | Cd EQS | mean Cd | Pb EQS | mean Pb |
|-----------------------|--------|--------------|--------|--------|---------|--------|---------|
| 2011                  | 13.8   | 17.4         |        | 0.08   | 0.1     | 7.2    | 2       |
| 2012                  | 13.8   | 28.          |        | 0.08   | 0.103   | 7.2    | 2       |
| 2013                  | 13.8   | 31.5         |        | 0.08   | 0.175   | 7.2    | 2.83    |
| 2014                  | 13.8   | 23.8         |        | 0.08   | 0.19    | 7.2    | 2       |
| 2018                  | 13.8   | 39.9         | 9.74   | 0.08   | 0.219   | 7.2    | 2.00    |
| 2019                  | 13.8   | 42           | 10.1   | 0.08   | 0.191   | 7.2    | 2.65    |
|                       |        |              |        |        |         |        |         |

| Rookery Brook PTCW RT | Zn EQS | Dissolved zn | bio zn | Cd EQS | mean Cd | Pb EQS | mean Pb |
|-----------------------|--------|--------------|--------|--------|---------|--------|---------|
| 2011                  | 13.8   | 551          |        | 0.08   | 1.85    | 7.2    | 19      |
| 2012                  | 13.8   | 453          |        | 0.08   | 1.98    | 7.2    | 21.6    |
| 2013                  | 13.8   | 368          |        | 0.08   | 1.7     | 7.2    | 27.3    |
| 2016                  | 13.8   | 407          |        | 0.08   | 1.36    | 7.2    | 20      |

Bioavailable data at Chudleigh bridge (*Environment Agency water quality archive*):

| RT at Chudleigh bridge |      |            |                               |
|------------------------|------|------------|-------------------------------|
| Year                   | pH   | DOC (mg/l) | Hardness (Total a CaCO3) mg/l |
| 2019                   | 7.57 | 3.81       | 34.8                          |
| 2018                   | 7.33 | 4.46       | 34.1                          |
| 2014                   | 7.41 | 3.09       | 32.4                          |
| 2013                   | 7.49 | 2.88       | 36.8                          |
| 2012                   | 7.33 | 3.2        | 37.3                          |
| 2011                   | 7.17 | 4.775      | 24.2                          |

**S9 Screenshot of Biomet tool, used to calculate the bioavailable concentrations of Zn at Chudleigh bridge, using pH, hardness and DOC.**

| Data Input & Results    |                |               |      |                                         |                                         |                                       |       |            |           |                                  |                              |      | bio met                       |      |       |  |
|-------------------------|----------------|---------------|------|-----------------------------------------|-----------------------------------------|---------------------------------------|-------|------------|-----------|----------------------------------|------------------------------|------|-------------------------------|------|-------|--|
| INPUT (MONITORING) DATA |                |               |      |                                         |                                         |                                       |       |            |           |                                  |                              |      | RESULTS (Zinc)                |      |       |  |
| ID                      | Sample Name    | Sample Number | Date | Measured Copper Conc (dissolved) [µg/L] | Measured Nickel Conc (dissolved) [µg/L] | Measured Zinc Conc (dissolved) [µg/L] | pH    | DOC [mg/L] | Ca [mg/L] | Zinc ABC Conc (dissolved) [µg/L] | Local EQS (dissolved) [µg/L] | BioF | Bioavailable Zinc Conc (µg/L) | RCR  | Notes |  |
| 1                       | Chudleigh 2011 |               |      |                                         |                                         | 17.35                                 | 7.22  | 4.77       | 24.2      |                                  | 22.29                        | 0.49 | 8.48                          | 0.78 |       |  |
| 2                       | Chudleigh 2012 |               |      |                                         |                                         | 28.13                                 | 7.37  | 3.255      | 37.3      |                                  | 19.52                        | 0.56 | 15.71                         | 1.44 |       |  |
| 3                       | Chudleigh 2013 |               |      |                                         |                                         | 31.46                                 | 7.51  | 2.88       | 38.9      |                                  | 20.72                        | 0.53 | 16.55                         | 1.52 |       |  |
| 4                       | Chudleigh 2014 |               |      |                                         |                                         | 23.8                                  | 7.41  | 3.09       | 32.4      |                                  | 20.10                        | 0.54 | 12.90                         | 1.18 |       |  |
| 5                       | Chudleigh 2018 |               |      |                                         |                                         | 39.88                                 | 7.342 | 4.462      | 34.2      |                                  | 23.32                        | 0.47 | 18.64                         | 1.71 |       |  |
| 6                       | Chudleigh 2019 |               |      |                                         |                                         | 44.43                                 | 7.84  | 3.812      | 34.8      |                                  | 26.75                        | 0.41 | 18.11                         | 1.66 |       |  |

**S10 Screenshot of Real World Application model, used to calculate the amount of pellets/biochar needed to reduce Zn levels below the EQS at Chudleigh**

| Metal   | EQS  | Metal Conc. In water body (µg/l) | Metal Conc. In water body (mg/l) | Amount above EQS (ug/l) | Amount above EQS (mg/l) | Flow (m3/s) (annual avg.) | Flow m3/s into l/s | Flow (l/s) x 60 = l/min | Flow (l/min) x 60 = l/hour | Flow (l/hr) x 24 = l/day | Flow l/day x 365 = l/yr | Exceedance (mg/l) x flow (l/yr) = (load) mg/yr | Load into kg/year | Capacity of pellets* (mg/kg) | g/kg | kg/kg  | Load (kg/yr) / adsorption capacity (kg/kg) = kg of pellets for year to reach EQS in water body | Tonnes of pellets a year required to reach EQS in water body | So. kg/yr of pellets / 586* = m3 required for amount of pellets |
|---------|------|----------------------------------|----------------------------------|-------------------------|-------------------------|---------------------------|--------------------|-------------------------|----------------------------|--------------------------|-------------------------|------------------------------------------------|-------------------|------------------------------|------|--------|------------------------------------------------------------------------------------------------|--------------------------------------------------------------|-----------------------------------------------------------------|
| Zinc    | 10.9 | 18.3                             | 0.01811                          | 7.2                     | 0.007                   | 5.3200                    | 5320               | 319200                  | 19152000                   | 453648000                | 1.678E+11               | 1209632659                                     | 1210              | 395.8                        | 0.40 | 0.0004 | 3056171                                                                                        | 3056                                                         | 5215                                                            |
| Cadmium | 0.08 | 0.2                              | 0.00019                          | 0.1                     | 0.000                   | 5.3200                    | 5320               | 319200                  | 19152000                   | 453648000                | 1.678E+11               | 18454867.2                                     | 18                | 1.56                         | 0.00 | 0.0000 | 11830043                                                                                       | 11830                                                        | 20188                                                           |
| Lead    | 7.2  | 2.7                              | 0.00265                          | -4.6                    | -0.005                  | 5.3200                    | 5320               | 319200                  | 19152000                   | 453648000                | 1.678E+11               | -763360416                                     | -763              | 2089                         | 2.09 | 0.0021 | -365419                                                                                        | -365                                                         | -624                                                            |

\*From laboratory, 586kg in 1m3

**Instructions:**  
 Columns coloured orange require input, the remaining columns populate automatically  
 1. Input the EQS of the metal into column B  
 2. Input metal concentration (µg/l) of the water body into column C  
 3. Input annual flow of water body in column G  
 4. Input pellet capacity in column O  
 5. Column S shows the amount of tonnes of pellets required per a year to reach the EQS

**\*Compressed pellet capacities:**  
 Cadmium: 35.40 mg/kg  
 Copper: 3.65 mg/kg  
 Iron: 42464 mg/kg  
 Lead: 2089 mg/kg  
 Zinc: 8743 mg/kg

|      | Agricultural biochar capacity | wood biochar capacity | Manure biochar capacity | Fired pellets capacity |
|------|-------------------------------|-----------------------|-------------------------|------------------------|
| Zinc | 11000mg/kg                    | Zinc 395.8mg/kg       | Zinc 4250mg/kg          | Zinc >150mg/kg         |
|      |                               |                       | Cadmium 16600mg/kg      | Cd >1.56               |
|      |                               |                       | Lead 19850mg/kg         | Pb >3.89               |

if Bridford up to 2000 kg/yr then Bridford could go within 50% of exceedance
